# Supplementary material
Source: ML conference proceedings conference paper supplement (https://openreview.net/forum?id=9ILaEDrwWY)

R<sup>2</sup> Scores: Variance Explained

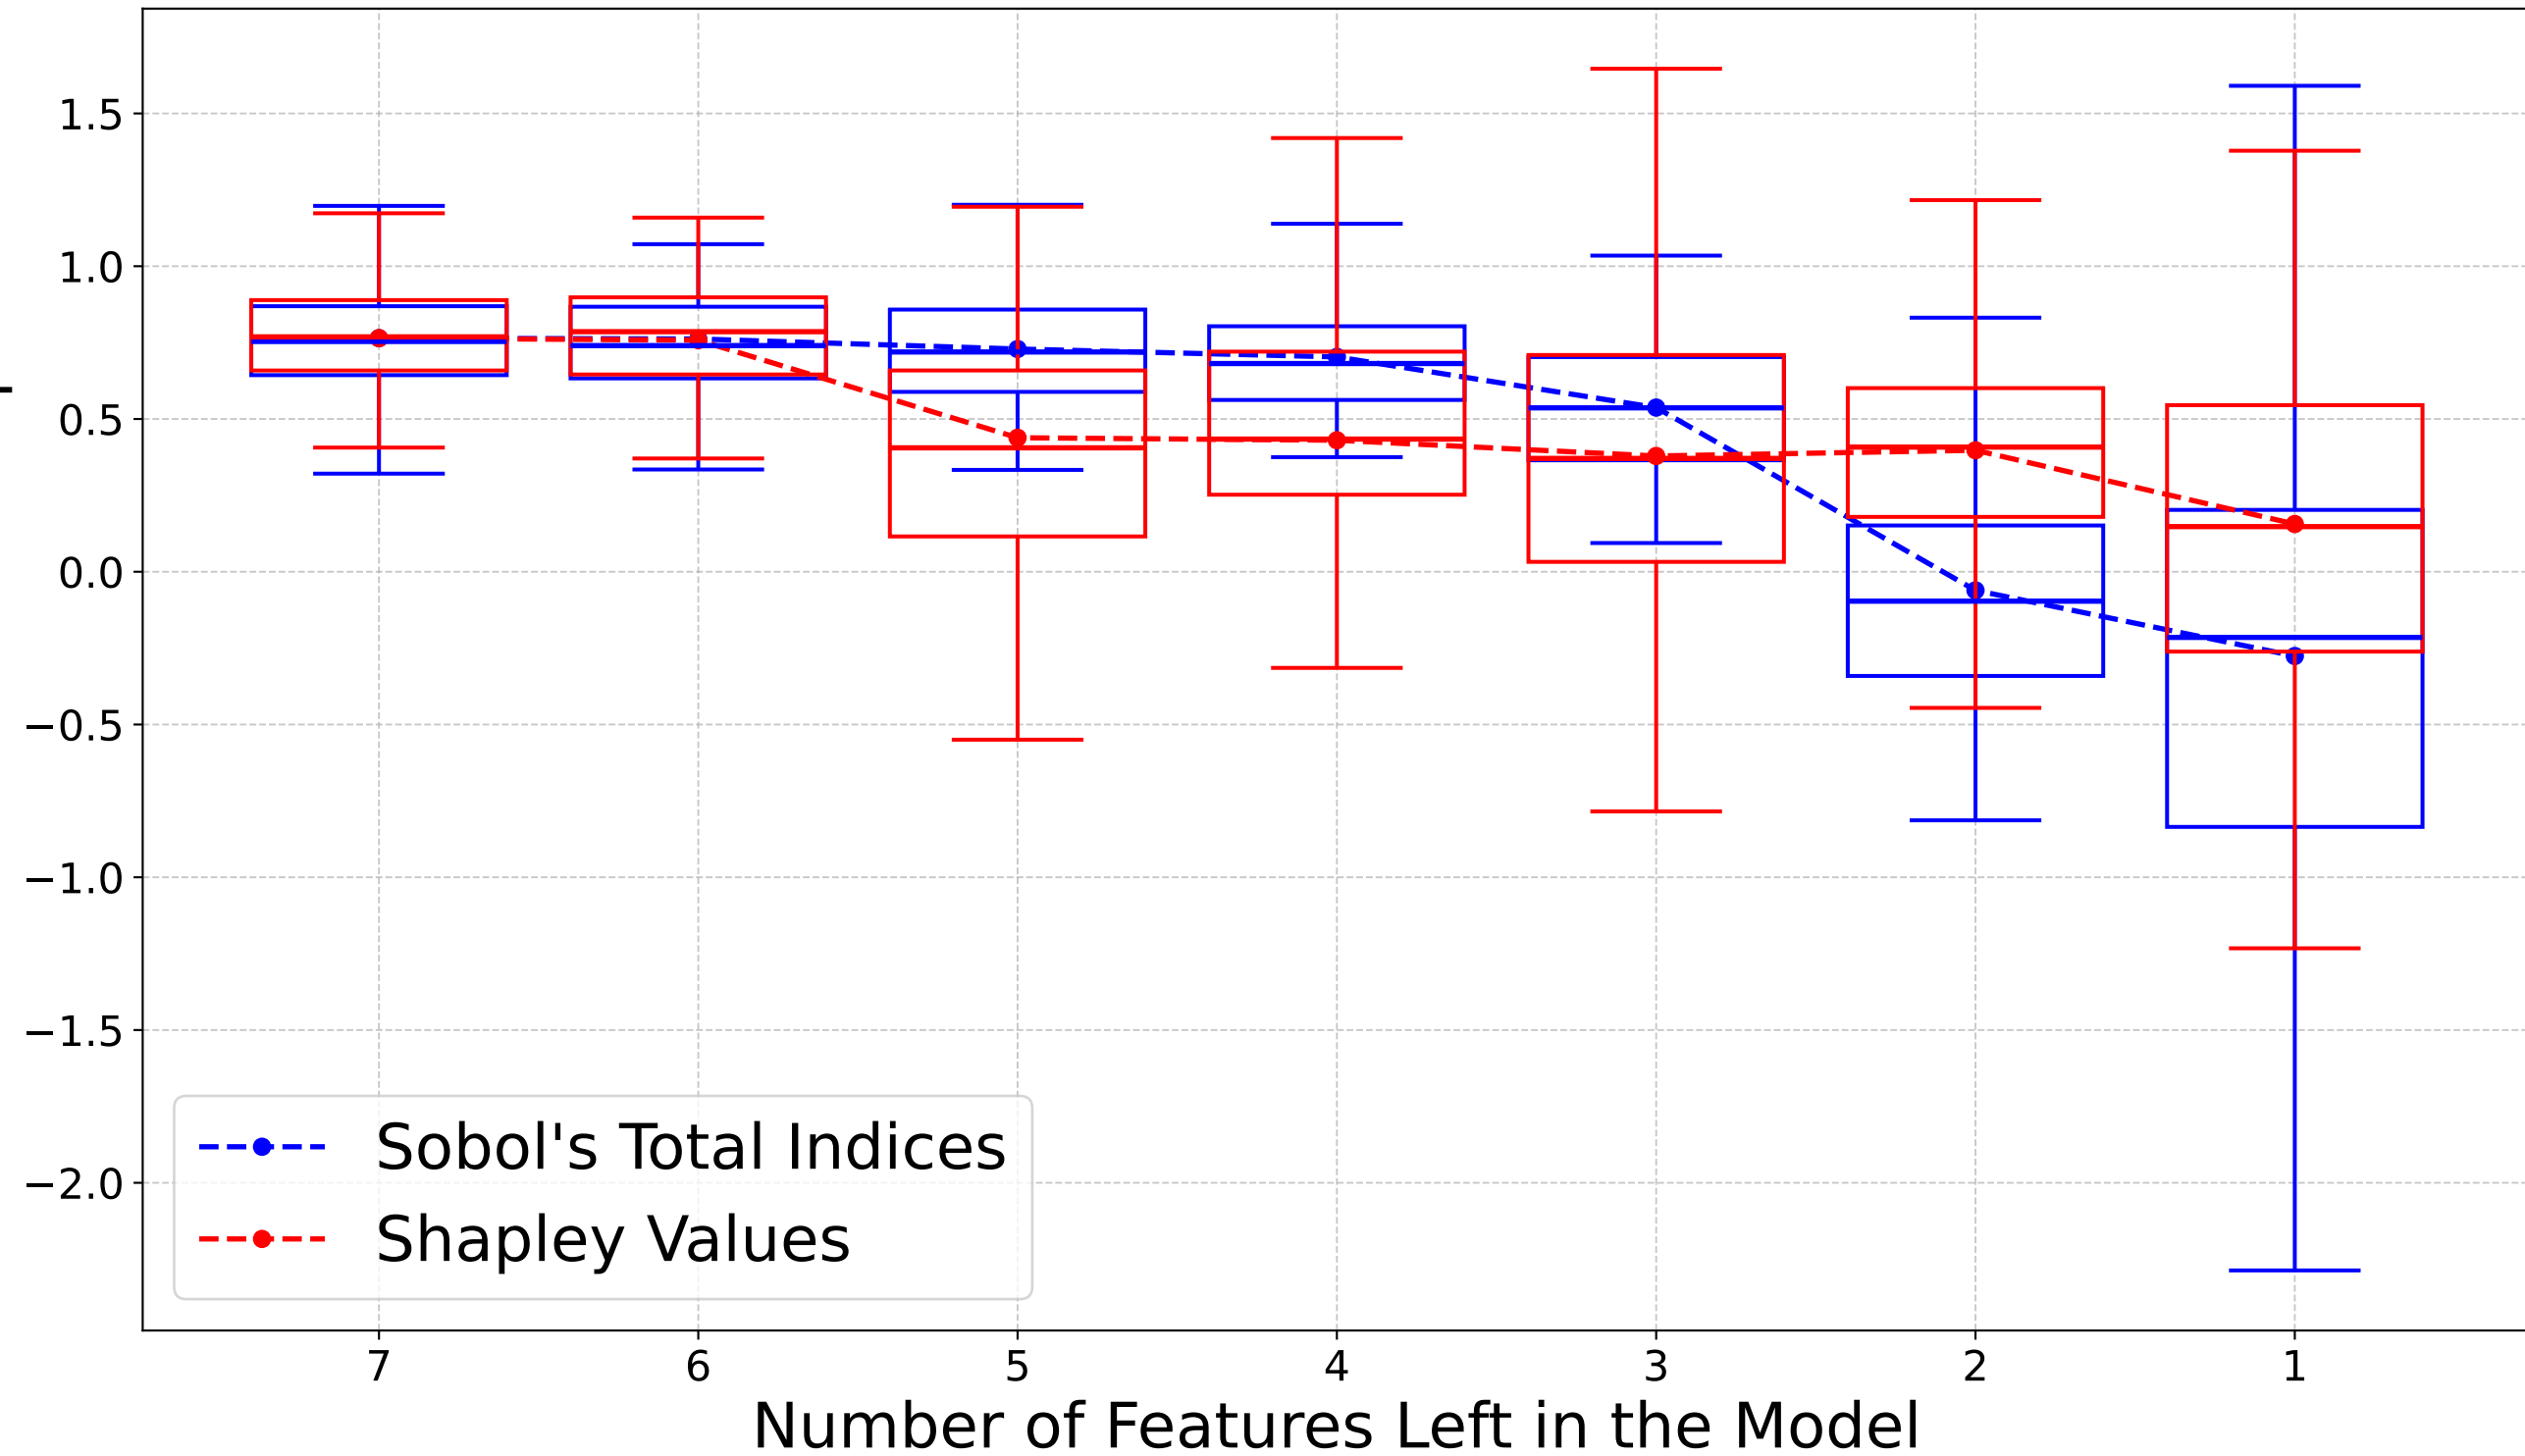

Supplement: supplementary_material [file attachment]

Runtime (seconds)

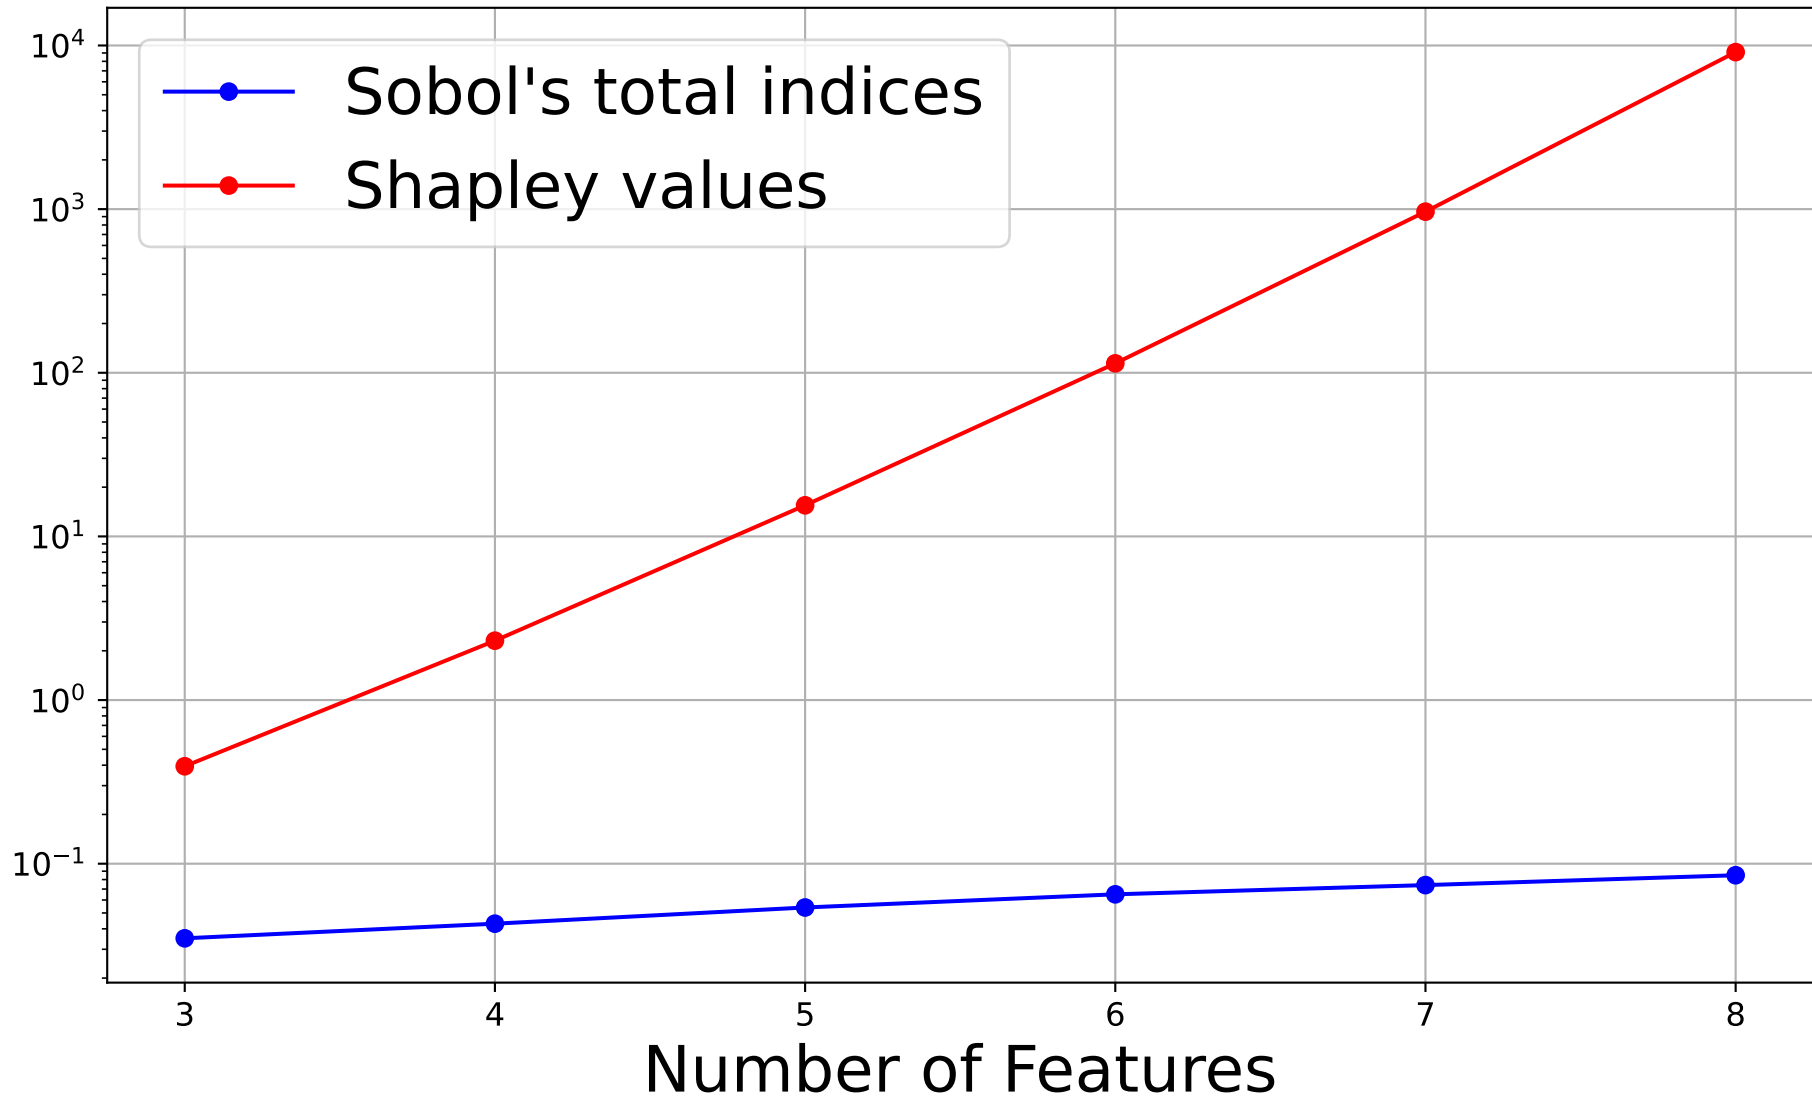

Supplement: supplementary_material [file attachment]

Runtime (seconds)

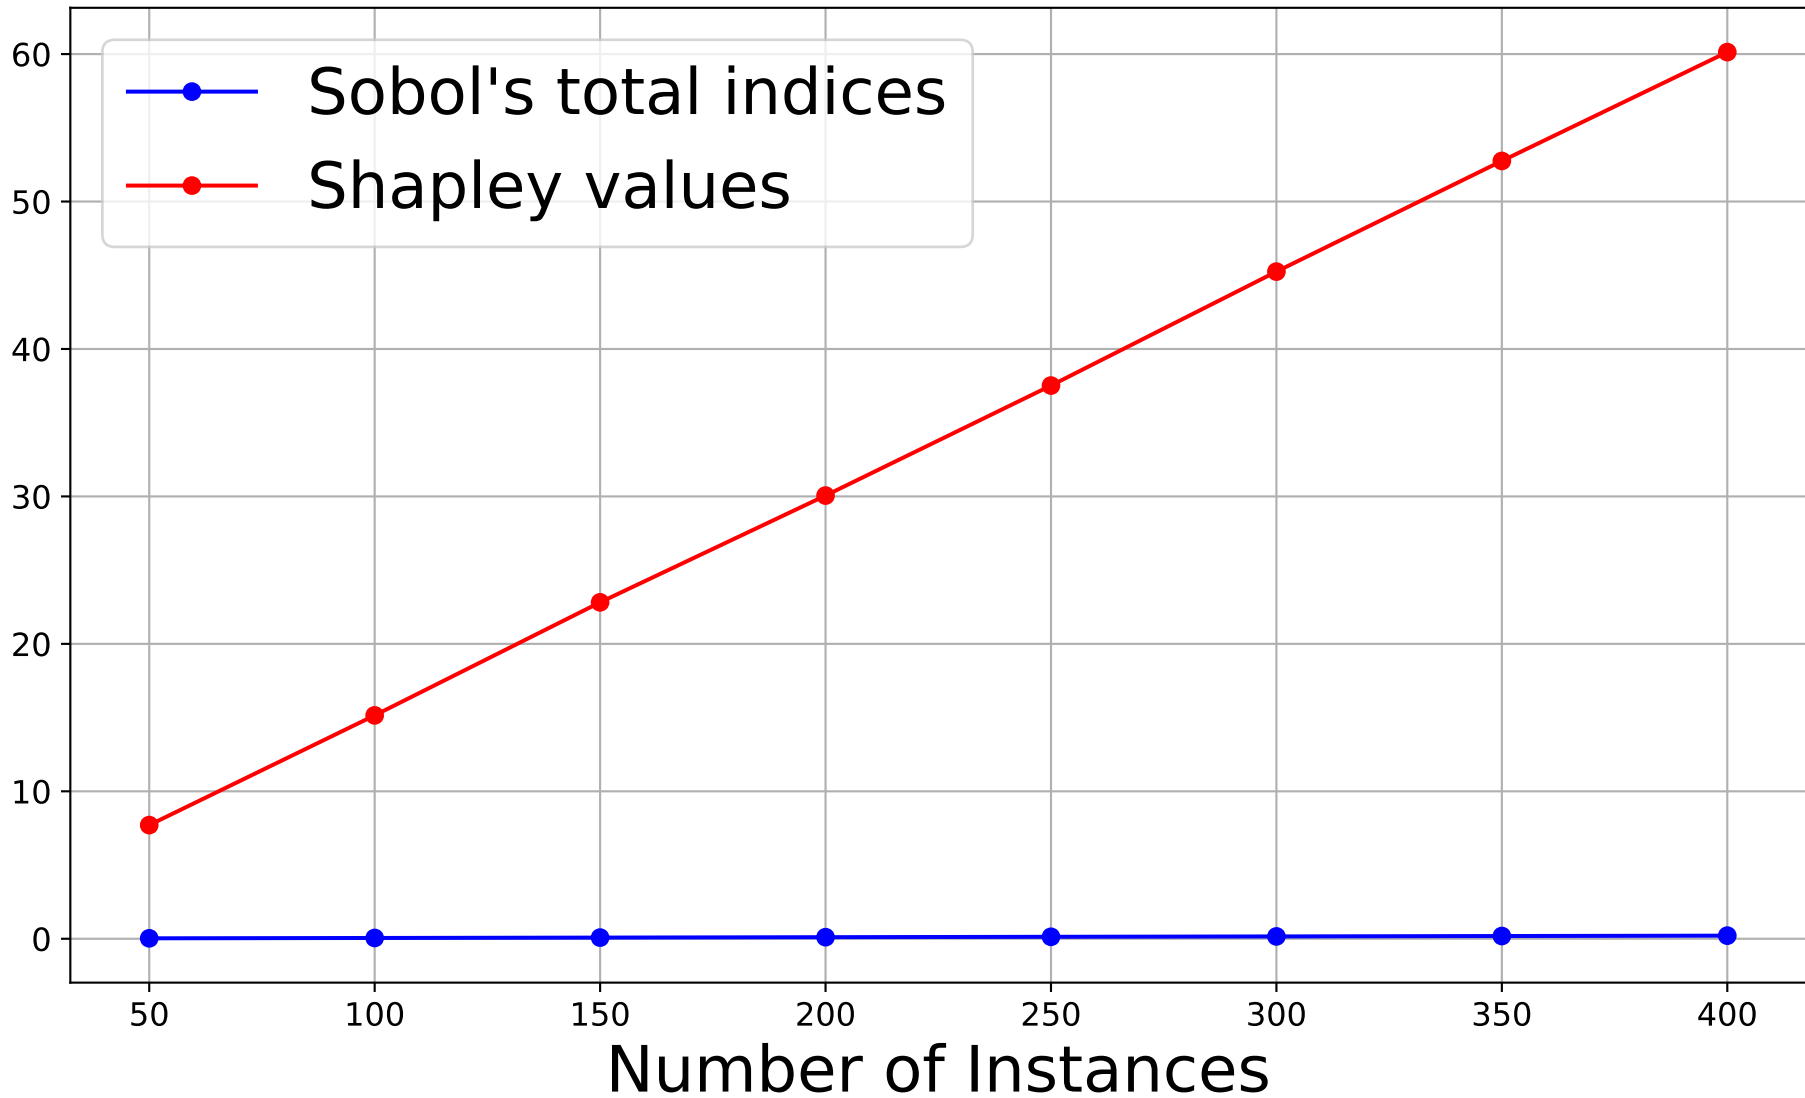

Supplement: supplementary_material [file attachment]

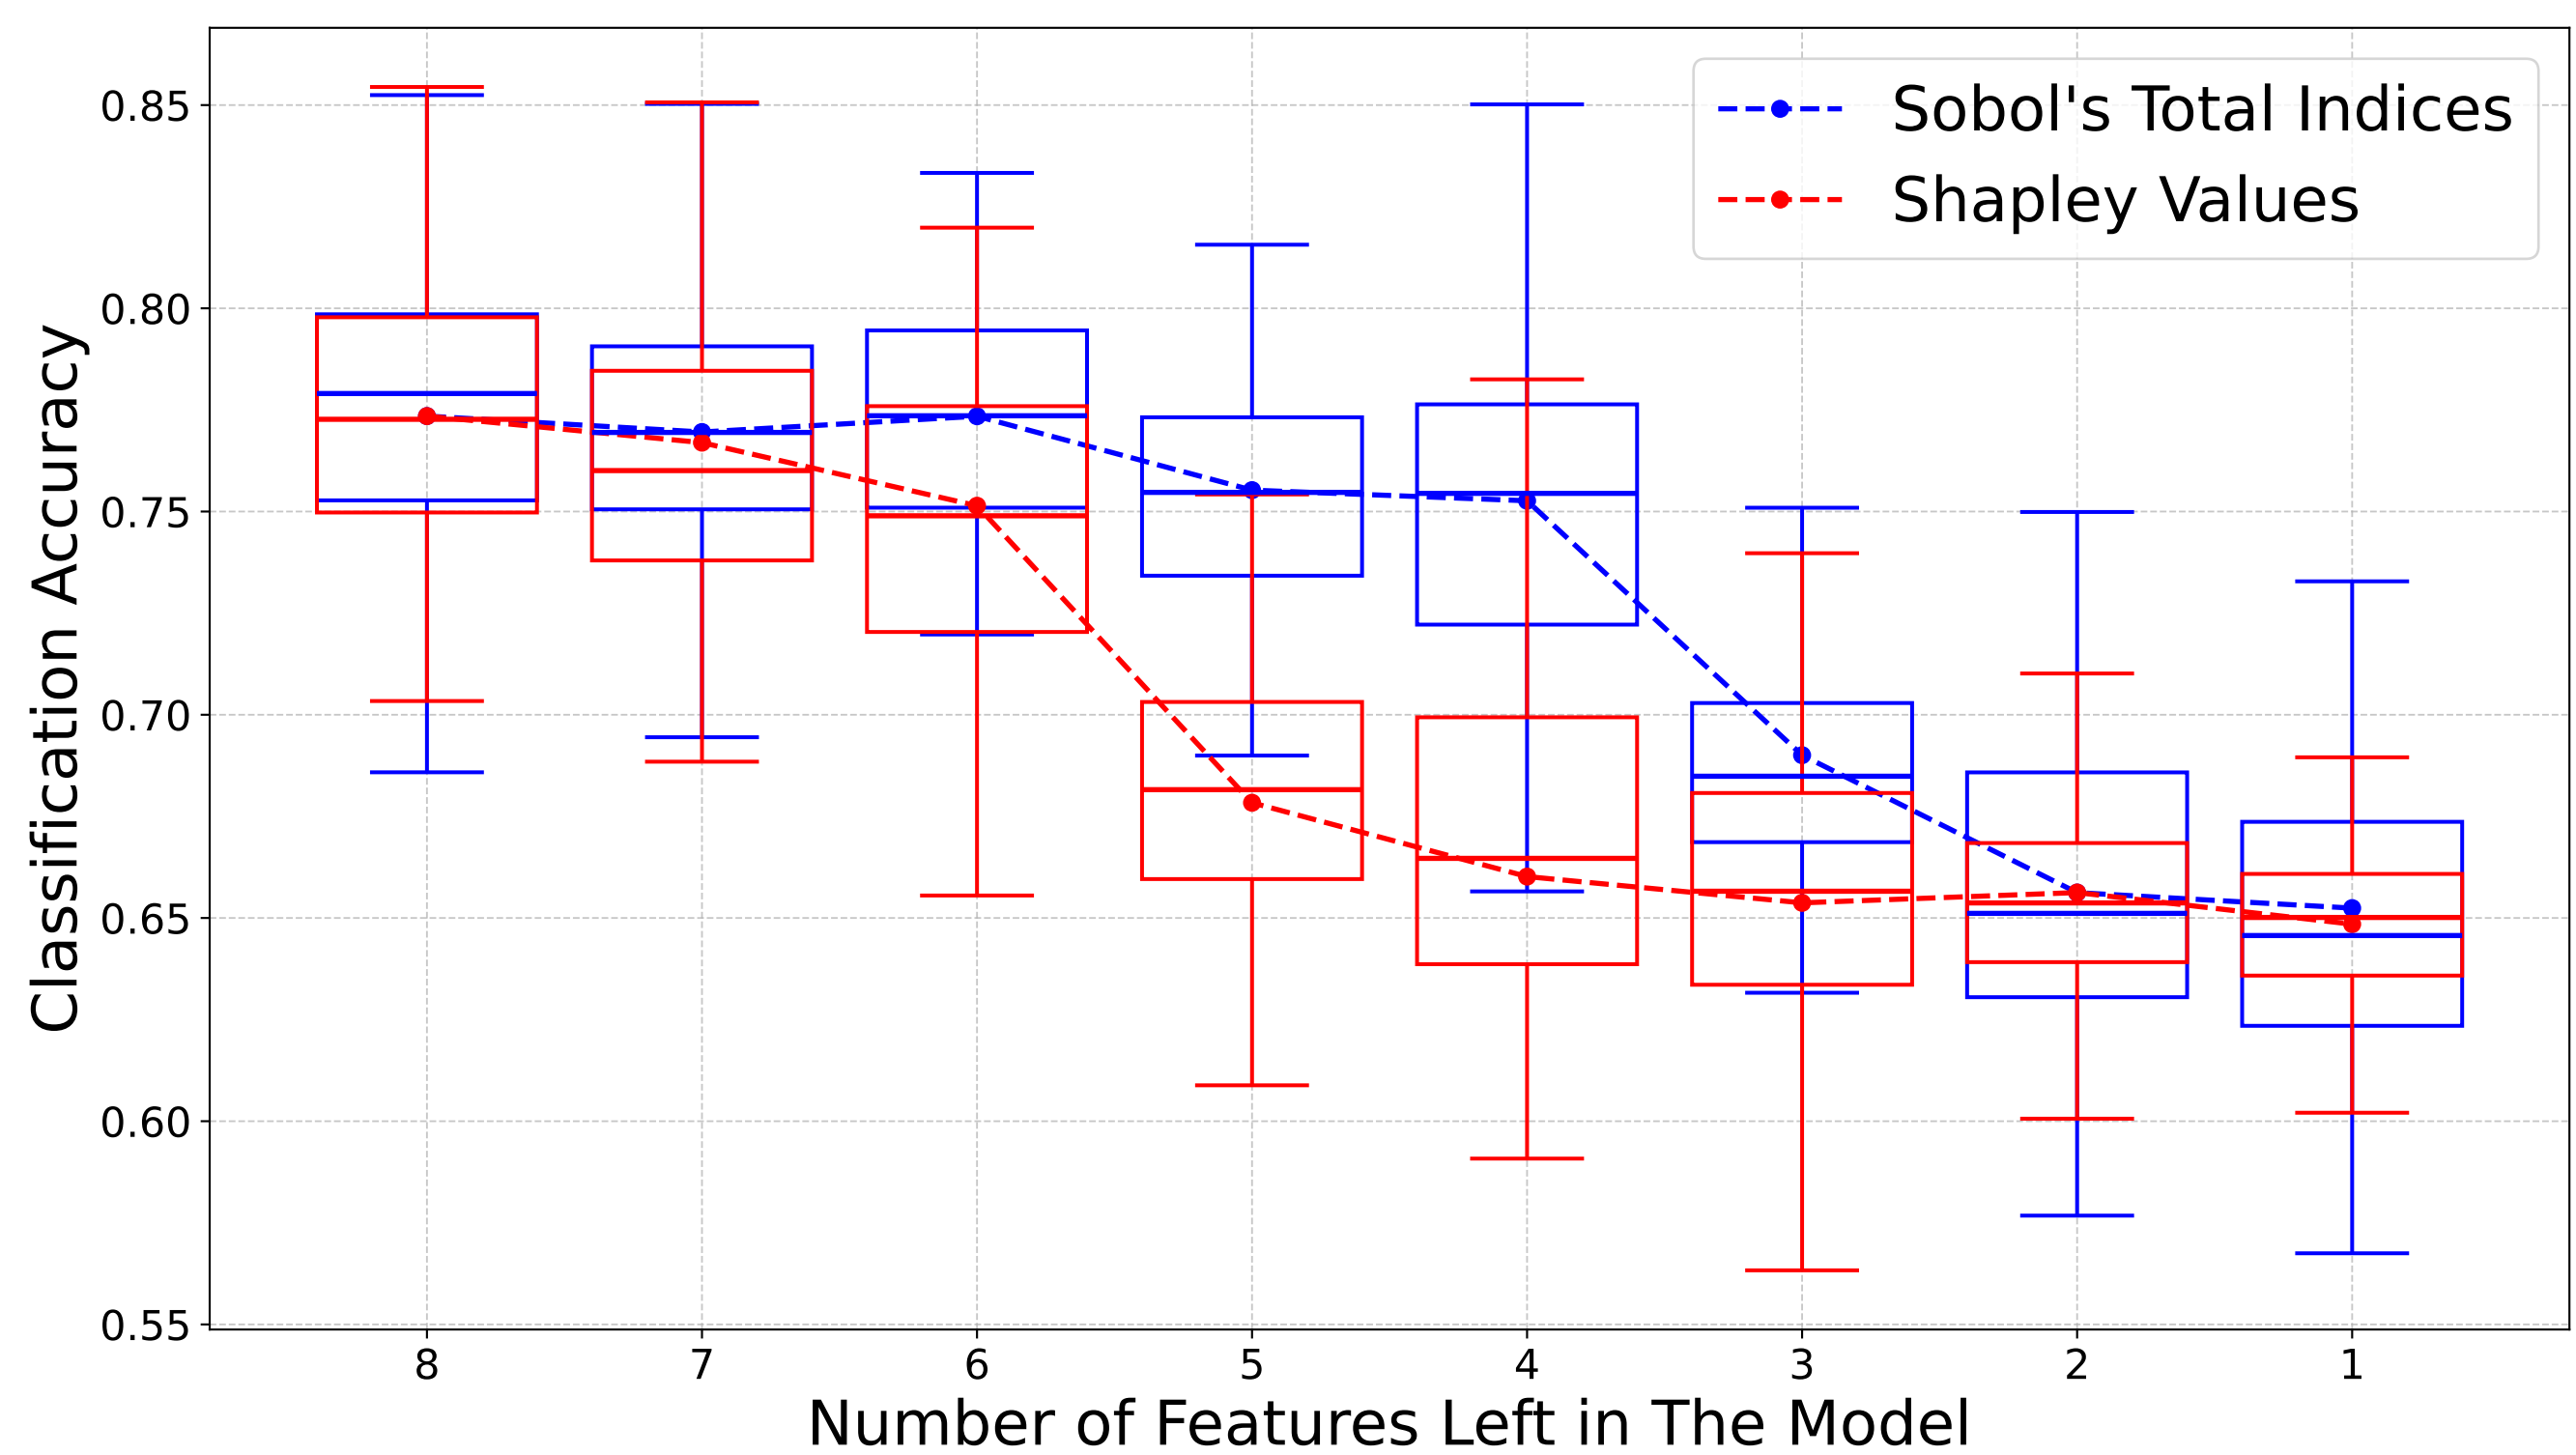

Supplement: supplementary_material [file attachment]
